# Supplementary material for: miR-34a-5p inhibits the malignant progression of KSHV-infected SH-SY5Y cells by targeting c-fos
Source: PeerJ journal article supplement (doi:10.7717/peerj.13233), 2022-04-15
Supplement: figure2.zip [file figure2.zip]

## Sheet: Sheet1
Raw data of cell viability assay
time	miR-NC			miR-34a-5p
24h	1	1	1	1	1	1
48h	1.15789	1.07292	1.1978	1	0.913979	1.04598
72h	1.62105	1.36458	1.46154	1.11765	1.12903	1.13793
96h	3.28421	3.57292	3.85714	1.76471	1.6129	1.66667
120h	6.74737	6.82292	6.89011	3.45882	3.98925	4.18391
