# Supplementary material for: miR-34a-5p inhibits the malignant progression of KSHV-infected SH-SY5Y cells by targeting c-fos
Source: PeerJ journal article supplement (doi:10.7717/peerj.13233), 2022-04-15
Supplement: figure3.zip [file figure3.zip]

## Sheet: Sheet1
The raw data of transwell migration assay
Migration	miR-NC	miR-34a-5p
1	36	8
2	39	9
3	39	9
