# Supplementary material for: miR-34a-5p inhibits the malignant progression of KSHV-infected SH-SY5Y cells by targeting c-fos
Source: PeerJ journal article supplement (doi:10.7717/peerj.13233), 2022-04-15
Supplement: figure4.zip [file figure4.zip]

## Sheet: Sheet1
	Raw data of dual luciferase assays
	miR-NC+c-fos-wt	miR-34a-5p+c-fos-wt	miR-NC+c-fos-mut	miR-34a-5p+c-fos-mut
	1.15051	0.996631	1.1224	1.12133
	1.11169	1.00287	1.05214	1.04055
	1.09325	1.01457	1.08727	1.08094
