# Supplementary material for: miR-34a-5p inhibits the malignant progression of KSHV-infected SH-SY5Y cells by targeting c-fos
Source: PeerJ journal article supplement (doi:10.7717/peerj.13233), 2022-04-15
Supplement: figure7.zip [file figure7.zip]

## Sheet: Sheet1
The raw data of real-time PCR assay
	miR-NC			miR-34a-5p			miR-34a-5p+pcDNA			miR-34a-5p+c-fos
LANA	1.03886	1.01748	1.01748	0.787308	0.849685	0.78187	1.05885	0.95429	1.04427	1.24186	1.2079	1.16675
RTA	0.977725	1.07736	1.0122	0.610262	0.606046	0.509622	0.987943	0.987943	1.01572	1.44643	1.40688	1.39716
K8.1	1.02456	0.976032	1.00347	0.449066	0.436786	0.390935	1.13288	0.888843	0.97942	1.34723	1.31039	1.33793
vGPCR	1.03168	0.929805	1.08298	0.427797	0.455335	0.390935	1.03766	1.04487	0.922314	1.3692	1.28639	1.30435
