# Supplementary material for: miR-34a-5p inhibits the malignant progression of KSHV-infected SH-SY5Y cells by targeting c-fos
Source: PeerJ journal article supplement (doi:10.7717/peerj.13233), 2022-04-15
Supplement: figure8.zip [file figure8.zip]

## Sheet: Sheet1
	time	miR-NC				miR-34a-5p
	6	43.87	45.59	33.46	34.77	32.55	56.03	34.71	33.71
	8	76.88	78.72	67.79	75.6	40.99	51.39	42.55	33.9
	10	196.29	88.28	116.75	96.2	78.73	57.48	55.39	53.44
	12	426.74	313.01	216.22	176.68	79.92	43.93	41.9	29.92
	14	888.78	656.02	758.08	333.3	138.3	41.54	29.48	51.42
	16	1466.81	933	789.67	788.99	377.84	60.27	84.75	114.69
	18	2554.52	1254.56	1163.8	1078.92	517.43	119.11	229.89	162.07
