# Supplementary material for: miR-34a-5p inhibits the malignant progression of KSHV-infected SH-SY5Y cells by targeting c-fos
Source: PeerJ journal article supplement (doi:10.7717/peerj.13233), 2022-04-15
Supplement: figure_S1.zip [file figure_S1.zip]

## Sheet: Sheet1
Raw data of cell viability assay
time	inhibitor-NC			miR-34a-5p inhibitor
24h	1	1	1	1	1	1
48h	2.03738	2.15563	2.23793	3.26403	3.06081	3.0034
72h	3.12773	3.25166	3.0931	4.49835	4.21959	3.80612
96h	3.86604	3.96689	3.53103	4.79868	4.90203	4.93537
120h	6.41122	5.64901	5.83793	7.89439	8.06419	7.82313
